# Supplementary material
Source: ML conference proceedings conference paper supplement (https://proceedings.mlr.press/v70/chen17a.html)
Supplement: Supplementary file 1 [file chen17a-supp.pdf]

---

# Supplementary Material to Robust Structured Estimation with Single-Index Models

---

Sheng Chen<sup>1</sup> Arindam Banerjee<sup>1</sup>

## Abstract

In this supplementary material, we present the deferred proofs of the results in the main paper.

## 1. Proof of Claim 1

**Statement of Claim 1:** *Suppose that each element  $x_i$  of  $\mathbf{x}$  is sampled i.i.d. from Rademacher distribution, i.e.,  $\mathbb{P}(x_i = 1) = \mathbb{P}(x_i = -1) = 0.5$ . Under model (3) with noise  $\epsilon = 0$ , there exists a  $\hat{\boldsymbol{\theta}} \in \mathbb{S}^{p-1}$  together with a monotone  $\bar{f}$ , such that  $\text{supp}(\hat{\boldsymbol{\theta}}) = \text{supp}(\boldsymbol{\theta}^*)$  and  $y_i = \bar{f}(\langle \hat{\boldsymbol{\theta}}, \mathbf{x}_i \rangle)$  for data  $\{(\mathbf{x}_i, y_i)\}_{i=1}^n$  with arbitrarily large sample size  $n$ , while  $\|\hat{\boldsymbol{\theta}} - \boldsymbol{\theta}^*\|_2 > \delta$  for some constant  $\delta$ .*

*Proof:* In the noiseless setting with unknown  $f^*$ , provided that  $\mathcal{S} \triangleq \text{supp}(\boldsymbol{\theta}^*)$  is given and  $|\mathcal{S}| = s$ , the estimation of  $\boldsymbol{\theta}^*$  is simplified as

$$\begin{aligned} & \text{Find } \boldsymbol{\theta}_{\mathcal{S}} \in \mathbb{S}^{s-1} \\ & \text{s.t. } \text{sign}(\langle \boldsymbol{\theta}_{\mathcal{S}}, \mathbf{x}_{i_{\mathcal{S}}} - \mathbf{x}_{j_{\mathcal{S}}} \rangle) = \text{sign}(y_i - y_j), \quad (\text{S.1}) \\ & \quad \forall 1 \leq i < j \leq n, \end{aligned}$$

any of whose solution  $\boldsymbol{\theta}$  can be true  $\boldsymbol{\theta}^*$  on the premise that no other information is available, since there always exists a monotone  $f$  satisfying  $f(\langle \boldsymbol{\theta}, \mathbf{x}_i \rangle) = y_i$ . Given the distribution of  $\mathbf{x}$ ,  $\mathbf{x}_{i_{\mathcal{S}}} - \mathbf{x}_{j_{\mathcal{S}}}$  only has  $3^s$  possibilities even if  $n \rightarrow +\infty$ . We denote the feasible set of (S.1) by  $\mathcal{C}$ , which is basically an intersection of  $\mathbb{S}^{s-1}$  and at most  $\min\{n(n-1), 3^p\}$  halfspaces (or hyperplanes if  $y_i = y_j$ ). Depending on the 3 different values of each  $\text{sign}(y_i - y_j)$ , this feasible set  $\mathcal{C}$  has at most  $3^{\min\{n(n-1), 3^p\}}$  possibilities, which is finite, and the union of them should be  $\mathbb{S}^{s-1}$ . When  $s \geq 2$  and the constant  $\delta$  is small enough, we can always find a  $\mathcal{C}$ , in which there exist two different points away by  $\delta$ . Specify them as  $\boldsymbol{\theta}_{*_{\mathcal{S}}}$  and  $\boldsymbol{\theta}_{\mathcal{S}}$  respectively, and

---

<sup>1</sup>Department of Computer Science & Engineering, University of Minnesota-Twin Cities, Minnesota, USA. Correspondence to: Sheng Chen <shengc@cs.umn.edu>, Arindam Banerjee <banerjee@cs.umn.edu>.

we are unable to distinguish between them, as both can be solution to (S.1) for any samples. ■

## 2. Proof of Lemma 1

**Statement of Lemma 1:** *Suppose the distribution of  $y$  in model (1) depends on  $\mathbf{x}$  through  $\langle \boldsymbol{\theta}^*, \mathbf{x} \rangle$  and we define accordingly*

$$\begin{aligned} & b_i(z_1, \dots, z_m; \boldsymbol{\theta}^*) = \quad (\text{S.2}) \\ & \mathbb{E}[q_i(y_1, \dots, y_m) | \langle \boldsymbol{\theta}^*, \mathbf{x}_1 \rangle = z_1, \dots, \langle \boldsymbol{\theta}^*, \mathbf{x}_m \rangle = z_m], \end{aligned}$$

With  $\mathbf{x}$  being standard Gaussian  $\mathcal{N}(\mathbf{0}, \mathbf{I})$ ,  $\mathbf{u}$  defined in (4) satisfies

$$\mathbb{E}[\mathbf{u}((\mathbf{x}_1, y_1), \dots, (\mathbf{x}_m, y_m))] = \beta \boldsymbol{\theta}^*, \quad (\text{S.3})$$

where  $\beta = \sum_{i=1}^m \mathbb{E}[b_i(g_1, \dots, g_m; \boldsymbol{\theta}^*) \cdot g_i]$ , and  $g_1, \dots, g_m$  are i.i.d. standard Gaussian.

*Proof:* Let  $\boldsymbol{\theta}_{\perp}$  be any vector orthogonal to  $\boldsymbol{\theta}^*$ . For convenience, we use the shorthand notation  $\mathbf{u}$  for  $\mathbf{u}((\mathbf{x}_1, y_1), \dots, (\mathbf{x}_m, y_m))$ . Then we have

$$\begin{aligned} \langle \mathbb{E}\mathbf{u}, \boldsymbol{\theta}_{\perp} \rangle &= \mathbb{E} \left[ \sum_{i=1}^m q_i(y_1, \dots, y_m) \cdot \langle \mathbf{x}_i, \boldsymbol{\theta}_{\perp} \rangle \right] \\ &= \sum_{i=1}^m \mathbb{E}[q_i(y_1, \dots, y_m) \cdot \langle \mathbf{x}_i, \boldsymbol{\theta}_{\perp} \rangle] \\ &= \sum_{i=1}^m \mathbb{E}[\langle \mathbf{x}_i, \boldsymbol{\theta}_{\perp} \rangle \cdot \mathbb{E}[q_i(y_1, \dots, y_m) | \mathbf{x}_1, \dots, \mathbf{x}_m]] \quad (*) \end{aligned}$$

As  $\mathbf{x}_i$  follows  $\mathcal{N}(\mathbf{0}, \mathbf{I})$ ,  $\langle \mathbf{x}_i, \boldsymbol{\theta}^* \rangle$  and  $\langle \mathbf{x}_i, \boldsymbol{\theta}_{\perp} \rangle$  are two zero-mean independent Gaussian random variables. Since the distribution of  $y_i$  depends on  $\mathbf{x}$  only via  $\langle \boldsymbol{\theta}^*, \mathbf{x}_i \rangle$ , we can split the expectation and obtain

$$\begin{aligned} (*) &= \sum_{i=1}^m \mathbb{E}[\langle \mathbf{x}_i, \boldsymbol{\theta}_{\perp} \rangle \cdot b_i(\langle \boldsymbol{\theta}^*, \mathbf{x}_1 \rangle, \dots, \langle \boldsymbol{\theta}^*, \mathbf{x}_m \rangle; \boldsymbol{\theta}^*)] \\ &= \sum_{i=1}^m \mathbb{E}[\langle \mathbf{x}_i, \boldsymbol{\theta}_{\perp} \rangle] \cdot \mathbb{E}[b_i(\langle \boldsymbol{\theta}^*, \mathbf{x}_1 \rangle, \dots, \langle \boldsymbol{\theta}^*, \mathbf{x}_m \rangle; \boldsymbol{\theta}^*)] \\ &= 0. \end{aligned}$$

Hence  $\mathbf{u}$  has to point towards either  $\boldsymbol{\theta}^*$  or  $-\boldsymbol{\theta}^*$ , and note that

$$\begin{aligned} \langle \mathbb{E}\mathbf{u}, \boldsymbol{\theta}^* \rangle &= \sum_{i=1}^m \mathbb{E} [g_i(y_1, \dots, y_m) \cdot \langle \mathbf{x}_i, \boldsymbol{\theta}^* \rangle] \\ &= \sum_{i=1}^m \mathbb{E} [b_i(\langle \boldsymbol{\theta}^*, \mathbf{x}_1 \rangle, \dots, \langle \boldsymbol{\theta}^*, \mathbf{x}_m \rangle; \boldsymbol{\theta}^*) \cdot \langle \mathbf{x}_i, \boldsymbol{\theta}^* \rangle] \\ &= \sum_{i=1}^m \mathbb{E} [b_i(g_1, \dots, g_m; \boldsymbol{\theta}^*) \cdot g_i] = \beta \end{aligned}$$

We complete the proof by recalling that  $\|\boldsymbol{\theta}^*\|_2 = 1$ , thus  $\mathbb{E}\mathbf{u} = \beta\boldsymbol{\theta}^*$ . ■

### 3. Proof of Theorem 1

We first provide a lemma that is useful for bounding the Gaussian width of unions of sets, which originates in Maurer et al. (2014).

**Lemma A (Lemma 2 in Maurer et al. (2014))** *Let  $M > 4$ ,  $\mathcal{A}_1, \dots, \mathcal{A}_M \subset \mathbb{R}^p$ , and  $\mathcal{A} = \cup_m \mathcal{A}_m$ . The Gaussian width of  $\mathcal{A}$  satisfies*

$$w(\mathcal{A}) \leq \max_{1 \leq m \leq M} w(\mathcal{A}_m) + 2 \sup_{\mathbf{z} \in \mathcal{A}} \|\mathbf{z}\|_2 \sqrt{\log M} \quad (\text{S.4})$$

**Statement of Theorem 1:** *Suppose that the optimization (9) can be solved to global minimum. Then the following error bound holds for the minimizer  $\hat{\boldsymbol{\theta}}$  with probability at least  $1 - C'' \exp(-w^2(\mathcal{A}_{\mathcal{K}}(\boldsymbol{\theta}^*)))$ ,*

$$\|\hat{\boldsymbol{\theta}} - \boldsymbol{\theta}^*\|_2 \leq \frac{C\kappa m^{\frac{3}{2}}}{\beta} \cdot \frac{w(\mathcal{A}_{\mathcal{K}}(\boldsymbol{\theta}^*)) + C'}{\sqrt{n}}, \quad (\text{S.5})$$

where  $\kappa$  is the sub-Gaussian norm of a standard Gaussian random variable, and  $C, C', C''$  are all absolute constants. *Proof:* We use the shorthand notation  $\mathcal{A}_{\mathcal{K}}$  for the set  $\mathcal{A}_{\mathcal{K}}(\boldsymbol{\theta}^*)$ . As  $\hat{\boldsymbol{\theta}}$  attains the global minimum of (9), we have

$$\begin{aligned} \langle \hat{\boldsymbol{\theta}} - \boldsymbol{\theta}^*, \hat{\mathbf{u}} \rangle \geq 0 &\iff \left\langle \hat{\boldsymbol{\theta}} - \boldsymbol{\theta}^*, \frac{\hat{\mathbf{u}}}{\beta} - \boldsymbol{\theta}^* + \boldsymbol{\theta}^* \right\rangle \geq 0 \\ \implies \langle \hat{\boldsymbol{\theta}}, \boldsymbol{\theta}^* \rangle &\geq 1 - \left\langle \hat{\boldsymbol{\theta}} - \boldsymbol{\theta}^*, \frac{\hat{\mathbf{u}}}{\beta} - \boldsymbol{\theta}^* \right\rangle \\ &\geq 1 - \|\hat{\boldsymbol{\theta}} - \boldsymbol{\theta}^*\|_2 \cdot \sup_{\mathbf{v} \in \mathcal{A}_{\mathcal{K}} \cup \{\mathbf{0}\}} \left\langle \mathbf{v}, \frac{\hat{\mathbf{u}}}{\beta} - \boldsymbol{\theta}^* \right\rangle \end{aligned}$$

In order to bound the supremum above, we use the result from generic chaining. We define the stochastic process  $\{Z_{\mathbf{v}} = \langle \mathbf{v}, \hat{\mathbf{u}}/\beta - \boldsymbol{\theta}^* \rangle\}_{\mathbf{v} \in \mathcal{A}_{\mathcal{K}} \cup \{\mathbf{0}\}}$ . First, we need to check the process has sub-Gaussian incremental. For simplicity, we denote  $\mathbf{u}((\mathbf{x}_{i_1}, y_{i_1}), \dots, (\mathbf{x}_{i_m}, y_{i_m}))$  by  $\mathbf{u}_{i_1, \dots, i_m}$ . By the definitions and properties of sub-Gaussian norm

(Vershynin, 2012), the sub-Gaussian norm of  $\mathbf{u}_{i_1, \dots, i_m}$  satisfies

$$\begin{aligned} \|\mathbf{u}_{i_1, \dots, i_m}\|_{\psi_2} &= \sup_{\mathbf{v} \in \mathbb{S}^{p-1}} \left\| \sum_{j=1}^m q_j(y_{i_1}, \dots, y_{i_m}) \cdot \langle \mathbf{x}_j, \mathbf{v} \rangle \right\|_{\psi_2} \\ &\leq \sup_{\mathbf{v} \in \mathbb{S}^{p-1}} \left\| \sum_{j=1}^m |\langle \mathbf{x}_j, \mathbf{v} \rangle| \right\|_{\psi_2} \\ &\leq m \cdot \sup_{\mathbf{v} \in \mathbb{S}^{p-1}} \|\langle \mathbf{x}_j, \mathbf{v} \rangle\|_{\psi_2} \leq \kappa m, \end{aligned}$$

thus we know  $\|\langle \mathbf{u}_{i_1, \dots, i_m}, \mathbf{v} - \mathbf{w} \rangle\|_{\psi_2} \leq \kappa m \cdot \|\mathbf{v} - \mathbf{w}\|_2$ . By Lemma 2, we have

$$\begin{aligned} \mathbb{P}(|Z_{\mathbf{v}} - Z_{\mathbf{w}}| > \delta) &= \mathbb{P}\left(\left| \left\langle \mathbf{v} - \mathbf{w}, \frac{\hat{\mathbf{u}}}{\beta} - \boldsymbol{\theta}^* \right\rangle \right| > \delta\right) \\ &= \mathbb{P}\left(\left| \frac{(n-m)!}{n!} \sum_{\substack{1 \leq i_1, \dots, i_m \leq n \\ i_1 \neq \dots \neq i_m}} \frac{1}{\beta} \cdot \langle \mathbf{u}_{i_1, \dots, i_m}, \mathbf{v} - \mathbf{w} \rangle \right. \right. \\ &\quad \left. \left. - \langle \mathbf{v} - \mathbf{w}, \boldsymbol{\theta}^* \rangle \right| > \delta\right) \\ &\leq 2 \exp\left(-C \left\lfloor \frac{n}{m} \right\rfloor \cdot \frac{\beta^2 \delta^2}{m^2 \kappa^2 \cdot \|\mathbf{v} - \mathbf{w}\|_2^2}\right) \\ &\leq 2 \exp\left(-C' \cdot \frac{n \beta^2 \delta^2}{m^3 \kappa^2 \cdot \|\mathbf{v} - \mathbf{w}\|_2^2}\right), \end{aligned}$$

where we set  $C' = C/2$ . Therefore we can conclude that  $\{Z_{\mathbf{v}}\}$  has sub-Gaussian incremental w.r.t. the metric  $s(\mathbf{v}, \mathbf{w}) \triangleq \kappa m^{\frac{3}{2}} \cdot \|\mathbf{v} - \mathbf{w}\|_2 / \beta \sqrt{n}$ . Now applying Lemma 3 to  $\{Z_{\mathbf{v}}\}$ , we obtain

$$\begin{aligned} \mathbb{P}\left(\sup_{\mathbf{v}, \mathbf{w} \in \mathcal{A}_{\mathcal{K}} \cup \{\mathbf{0}\}} |Z_{\mathbf{v}} - Z_{\mathbf{w}}| \geq C_1 \left(\gamma_2(\mathcal{A}_{\mathcal{K}} \cup \{\mathbf{0}\}, s) \right. \right. \\ \left. \left. + \delta \cdot \text{diam}(\mathcal{A}_{\mathcal{K}} \cup \{\mathbf{0}\}, s)\right)\right) &\leq C_2 \exp(-\delta^2) \\ \implies \mathbb{P}\left(\sup_{\mathbf{v} \in \mathcal{A}_{\mathcal{K}} \cup \{\mathbf{0}\}} |Z_{\mathbf{v}}| \geq \frac{C_1 \kappa m^{\frac{3}{2}}}{\beta \sqrt{n}} \cdot \left(\gamma_2(\mathcal{A}_{\mathcal{K}} \cup \{\mathbf{0}\}, \|\cdot\|_2) \right. \right. \\ \left. \left. + 2\delta\right)\right) &\leq C_2 \exp(-\delta^2) \end{aligned}$$

Using Lemma 4  $\gamma_2(\mathcal{A}_{\mathcal{K}} \cup \{\mathbf{0}\}, \|\cdot\|_2) \leq C_0 \cdot w(\mathcal{A}_{\mathcal{K}} \cup \{\mathbf{0}\})$  and taking  $\delta = w(\mathcal{A}_{\mathcal{K}} \cup \{\mathbf{0}\})$ , we get

$$\begin{aligned} \sup_{\mathbf{v} \in \mathcal{A}_{\mathcal{K}} \cup \{\mathbf{0}\}} \left\langle \mathbf{v}, \frac{\hat{\mathbf{u}}}{\beta} - \boldsymbol{\theta}^* \right\rangle &\leq \sup_{\mathbf{v} \in \mathcal{A}_{\mathcal{K}} \cup \{\mathbf{0}\}} |Z_{\mathbf{v}}| \\ &\leq \frac{C_3 \kappa m^{\frac{3}{2}}}{\beta \sqrt{n}} \cdot w(\mathcal{A}_{\mathcal{K}} \cup \{\mathbf{0}\}) \leq \frac{C_3 \kappa m^{\frac{3}{2}}}{\beta} \cdot \frac{w(\mathcal{A}_{\mathcal{K}}) + C_4}{\sqrt{n}} \end{aligned}$$

with probability at least  $1 - C_2 \exp(-w^2(\mathcal{A}_{\mathcal{K}}))$ . The last inequality follows from Lemma A. Now we turn to the

quantity  $\|\hat{\boldsymbol{\theta}} - \boldsymbol{\theta}^*\|_2$ ,

$$\begin{aligned} \|\hat{\boldsymbol{\theta}} - \boldsymbol{\theta}^*\|_2^2 &\leq 2 - 2\langle \hat{\boldsymbol{\theta}}, \boldsymbol{\theta}^* \rangle \\ &\leq 2 - 2 \left( 1 - \|\hat{\boldsymbol{\theta}} - \boldsymbol{\theta}^*\|_2 \cdot \frac{C_3 \kappa m^{\frac{3}{2}}}{\beta} \cdot \frac{w(\mathcal{A}_{\mathcal{K}}) + C_4}{\sqrt{n}} \right) \\ &\leq \|\hat{\boldsymbol{\theta}} - \boldsymbol{\theta}^*\|_2 \cdot \frac{2C_3 \kappa m^{\frac{3}{2}}}{\beta} \cdot \frac{w(\mathcal{A}_{\mathcal{K}}) + C_4}{\sqrt{n}}. \end{aligned}$$

We finish the proof by letting  $C = 2C_3$ ,  $C' = C_4$  and  $C'' = C_2$ .  $\blacksquare$

#### 4. Proof of Theorem 2

**Statement of Theorem 2:** Define the following set for any  $\rho > 1$ ,

$$\mathcal{A}_\rho(\boldsymbol{\theta}^*) = \text{cone} \left\{ \mathbf{v} \mid \|\mathbf{v} + \boldsymbol{\theta}^*\| \leq \|\boldsymbol{\theta}^*\| + \frac{\|\mathbf{v}\|}{\rho} \right\} \cap \mathbb{S}^{p-1} \quad (\text{S.6})$$

If we set  $\lambda = \rho \|\hat{\mathbf{u}} - \beta \boldsymbol{\theta}^*\|_* = O(\rho m^{3/2} w(\mathcal{B}_{\|\cdot\|}) / \sqrt{n})$  and it satisfies  $\lambda < \|\hat{\mathbf{u}}\|_*$ , then with probability at least  $1 - C' \exp(-w^2(\mathcal{B}_{\|\cdot\|}))$ ,  $\hat{\boldsymbol{\theta}}$  in (10) satisfies

$$\|\hat{\boldsymbol{\theta}} - \boldsymbol{\theta}^*\|_2 \leq \frac{C(1+\rho)\kappa m^{\frac{3}{2}}}{\beta} \cdot \frac{\Psi(\mathcal{A}_\rho(\boldsymbol{\theta}^*)) \cdot w(\mathcal{B}_{\|\cdot\|})}{\sqrt{n}}, \quad (\text{S.7})$$

where  $\Psi(\mathcal{A}_\rho(\boldsymbol{\theta}^*)) = \sup_{\mathbf{v} \in \mathcal{A}_\rho(\boldsymbol{\theta}^*)} \|\mathbf{v}\|$  and  $\mathcal{B}_{\|\cdot\|} = \{\mathbf{v} \mid \|\mathbf{v}\| \leq 1\}$  is the unit ball of norm  $\|\cdot\|$ .

*Proof:* Based on the optimality of  $\hat{\boldsymbol{\theta}}$ , we have

$$\begin{aligned} -\langle \hat{\mathbf{u}}, \hat{\boldsymbol{\theta}} \rangle + \lambda \|\hat{\boldsymbol{\theta}}\| &\leq -\langle \hat{\mathbf{u}}, \boldsymbol{\theta}^* \rangle + \lambda \|\boldsymbol{\theta}^*\| \implies \\ &\langle \beta \boldsymbol{\theta}^* - \hat{\mathbf{u}} - \beta \boldsymbol{\theta}^*, \hat{\boldsymbol{\theta}} \rangle + \lambda \|\hat{\boldsymbol{\theta}}\| \\ &\leq \langle \beta \boldsymbol{\theta}^* - \hat{\mathbf{u}} - \beta \boldsymbol{\theta}^*, \boldsymbol{\theta}^* \rangle + \lambda \|\boldsymbol{\theta}^*\| \implies \\ \beta(1 - \langle \boldsymbol{\theta}^*, \hat{\boldsymbol{\theta}} \rangle) &\leq \langle \hat{\mathbf{u}} - \beta \boldsymbol{\theta}^*, \hat{\boldsymbol{\theta}} - \boldsymbol{\theta}^* \rangle + \lambda(\|\boldsymbol{\theta}^*\| - \|\hat{\boldsymbol{\theta}}\|) \end{aligned}$$

Since  $\langle \boldsymbol{\theta}^*, \hat{\boldsymbol{\theta}} \rangle \leq 1$ , we have

$$\begin{aligned} \langle \hat{\mathbf{u}} - \beta \boldsymbol{\theta}^*, \hat{\boldsymbol{\theta}} - \boldsymbol{\theta}^* \rangle + \lambda(\|\boldsymbol{\theta}^*\| - \|\hat{\boldsymbol{\theta}}\|) &\geq 0 \implies \\ \|\hat{\boldsymbol{\theta}}\| &\leq \|\boldsymbol{\theta}^*\| + \frac{1}{\lambda} \cdot \langle \hat{\mathbf{u}} - \beta \boldsymbol{\theta}^*, \hat{\boldsymbol{\theta}} - \boldsymbol{\theta}^* \rangle \\ &\leq \|\boldsymbol{\theta}^*\| + \frac{1}{\lambda} \cdot \|\hat{\mathbf{u}} - \beta \boldsymbol{\theta}^*\|_* \|\hat{\boldsymbol{\theta}} - \boldsymbol{\theta}^*\| \\ &= \|\boldsymbol{\theta}^*\| + \frac{1}{\rho} \|\hat{\boldsymbol{\theta}} - \boldsymbol{\theta}^*\| \implies \hat{\boldsymbol{\theta}} - \boldsymbol{\theta}^* \in \mathcal{A}_\rho(\boldsymbol{\theta}^*) \end{aligned}$$

Therefore it follows that

$$\begin{aligned} 1 - \langle \boldsymbol{\theta}^*, \hat{\boldsymbol{\theta}} \rangle &\leq \left\langle \frac{\hat{\mathbf{u}}}{\beta} - \boldsymbol{\theta}^*, \hat{\boldsymbol{\theta}} - \boldsymbol{\theta}^* \right\rangle + \frac{\lambda}{\beta} (\|\boldsymbol{\theta}^*\| - \|\hat{\boldsymbol{\theta}}\|) \\ &\leq \|\hat{\boldsymbol{\theta}} - \boldsymbol{\theta}^*\|_2 \left( \left\| \frac{\hat{\mathbf{u}}}{\beta} - \boldsymbol{\theta}^* \right\|_* \cdot \frac{\|\hat{\boldsymbol{\theta}} - \boldsymbol{\theta}^*\|}{\|\hat{\boldsymbol{\theta}} - \boldsymbol{\theta}^*\|_2} + \frac{\lambda}{\beta} \cdot \frac{\|\hat{\boldsymbol{\theta}} - \boldsymbol{\theta}^*\|}{\|\hat{\boldsymbol{\theta}} - \boldsymbol{\theta}^*\|_2} \right) \\ &\leq (1 + \rho) \|\hat{\boldsymbol{\theta}} - \boldsymbol{\theta}^*\|_2 \cdot \left\| \frac{\hat{\mathbf{u}}}{\beta} - \boldsymbol{\theta}^* \right\|_* \cdot \sup_{\mathbf{v} \in \mathcal{A}_\rho(\boldsymbol{\theta}^*)} \|\mathbf{v}\| \\ &= (1 + \rho) \|\hat{\boldsymbol{\theta}} - \boldsymbol{\theta}^*\|_2 \cdot \left\| \frac{\hat{\mathbf{u}}}{\beta} - \boldsymbol{\theta}^* \right\|_* \cdot \Psi(\mathcal{A}_\rho(\boldsymbol{\theta}^*)) \end{aligned} \quad (\text{S.8})$$

Now we try to bound  $\left\| \frac{\hat{\mathbf{u}}}{\beta} - \boldsymbol{\theta}^* \right\|_*$ . We first rewrite it as  $\left\| \frac{\hat{\mathbf{u}}}{\beta} - \boldsymbol{\theta}^* \right\|_* = \sup_{\mathbf{v} \in \mathcal{B}_{\|\cdot\|}} \left\langle \frac{\hat{\mathbf{u}}}{\beta} - \boldsymbol{\theta}^*, \mathbf{v} \right\rangle$ . Construct the stochastic process  $\{Z_{\mathbf{v}} = \langle \mathbf{v}, \hat{\mathbf{u}}/\beta - \boldsymbol{\theta}^* \rangle\}_{\mathbf{v} \in \mathcal{B}_{\|\cdot\|}}$ , and it is not difficult to verify that  $\{Z_{\mathbf{v}}\}$  has sub-Gaussian incremental using the proof in Theorem 1. Now applying Lemma 3 and 4, we have

$$\begin{aligned} \sup_{\mathbf{v} \in \mathcal{B}_{\|\cdot\|}} \left\langle \frac{\hat{\mathbf{u}}}{\beta} - \boldsymbol{\theta}^*, \mathbf{v} \right\rangle &= \frac{1}{2} \cdot \sup_{\mathbf{v}, \mathbf{w} \in \mathcal{B}_{\|\cdot\|}} |Z_{\mathbf{v}} - Z_{\mathbf{w}}| \\ &\leq \frac{C_1 \kappa m^{\frac{3}{2}}}{\beta} \cdot \frac{w(\mathcal{B}_{\|\cdot\|})}{\sqrt{n}}, \end{aligned} \quad (\text{S.9})$$

with probability at least  $1 - C' \exp(-w^2(\mathcal{B}_{\|\cdot\|}))$ . Therefore we know that  $\lambda$  satisfies

$$\lambda = O\left(\frac{\rho m^{3/2} w(\mathcal{B}_{\|\cdot\|})}{\sqrt{n}}\right)$$

If  $\hat{\boldsymbol{\theta}} = \mathbf{0}$  is the minimizer, the first-order optimality should hold, i.e.,

$$\hat{\mathbf{u}} \in \lambda \cdot \partial \|\mathbf{0}\| \implies \|\hat{\mathbf{u}}\|_* \leq \lambda$$

Hence if  $\lambda < \|\hat{\mathbf{u}}\|_*$ ,  $\mathbf{0}$  cannot be the minimizer, which means that the minimum of (10) must be negative. So we can assert that  $\|\hat{\boldsymbol{\theta}}\|_2 = 1$ , otherwise we can normalize  $\hat{\boldsymbol{\theta}}$  to get a smaller objective value. Combining (S.8) and (S.9), we finally get

$$\begin{aligned} \|\hat{\boldsymbol{\theta}} - \boldsymbol{\theta}^*\| &= \frac{2 - 2\langle \hat{\boldsymbol{\theta}}, \boldsymbol{\theta}^* \rangle}{\|\hat{\boldsymbol{\theta}} - \boldsymbol{\theta}^*\|} \\ &\leq \frac{Cm\kappa(1+\rho)}{\beta} \cdot \frac{\Psi(\mathcal{A}_\rho(\boldsymbol{\theta}^*)) \cdot w(\mathcal{B}_{\|\cdot\|})}{\sqrt{n}}, \end{aligned}$$

where the equality uses the fact that  $\|\hat{\boldsymbol{\theta}}\|_2 = 1$ .  $\blacksquare$

#### 5. Proof of Corollary 1

**Statement of Corollary 1:** Assume that  $\{(\mathbf{x}_i, y_i)\}_{i=1}^n$  follow 1-bit CS model in (2) and  $\hat{\mathbf{u}}$  is given as (14). For any

$s$ -sparse  $\theta^*$ , with high probability,  $\hat{\theta}$  produced by both (15) and (17) (i.e.,  $\hat{\theta}^{ks}$  and  $\hat{\theta}^{ps}$ ) satisfy

$$\|\hat{\theta} - \theta^*\|_2 \leq O\left(\sqrt{\frac{s \log p}{n}}\right) \quad (\text{S.10})$$

*Proof:* For the  $k$ -support norm estimator, the cone  $\mathcal{A}_{\mathcal{K}}(\theta^*)$  is given by

$$\begin{aligned} \mathcal{A}_{\mathcal{K}}(\theta^*) &= \text{cone}\left\{\hat{\theta} - \theta^* \mid \|\hat{\theta}\|_0 \leq s, \|\hat{\theta}\|_2 \leq 1\right\} \cap \mathbb{S}^{p-1} \\ \implies \mathcal{A}_{\mathcal{K}}(\theta^*) &\subseteq \mathcal{S} = \{\mathbf{v} \mid \|\mathbf{v}\|_0 \leq 2s\} \cap \mathbb{S}^{p-1} \end{aligned}$$

Using (19) from (Chen & Banerjee, 2015), we have

$$w(\mathcal{A}_{\mathcal{K}}(\theta^*)) \leq w(\mathcal{S}) \leq O\left(\sqrt{s \log p}\right).$$

By Theorem 1, the error of  $k$ -support norm estimator satisfies

$$\|\hat{\theta}^{ks} - \theta^*\|_2 \leq O\left(\sqrt{\frac{s \log p}{n}}\right)$$

For the passive algorithm, if we choose  $\rho = 2$ , the restricted norm compatibility  $\Psi(\mathcal{A}_{\rho}(\theta^*))$  for  $L_1$  norm satisfies

$$\Psi(\mathcal{A}_{\rho}(\theta^*)) \leq 4\sqrt{s} \quad (\text{S.11})$$

according to the results in (Negahban et al., 2012; Banerjee et al., 2014). Chen & Banerjee (2015) also show that the Gaussian width of the  $L_1$ -norm ball is bounded by

$$w(\mathcal{B}_{L_1}) \leq O\left(\sqrt{\log p}\right). \quad (\text{S.12})$$

Now combining (S.11), (S.12) and Theorem 2, we can conclude that

$$\|\hat{\theta}^{ps} - \theta^*\|_2 \leq O\left(\sqrt{\frac{s \log p}{n}}\right),$$

which completes the proof.  $\blacksquare$

## 6. Proof of Proposition 1

**Statement of Proposition 1:** Given  $\{(\mathbf{x}_i, y_i)\}_{i=1}^n$ , let  $\pi^\downarrow$  be the permutation of  $\{1, \dots, n\}$  such that  $y_{\pi_1^\downarrow} > y_{\pi_2^\downarrow} > \dots > y_{\pi_n^\downarrow}$ . Then we have

$$\hat{\mathbf{h}} = \frac{2}{n(n-1)} \sum_{i=1}^n (n+1-2i) \cdot \mathbf{x}_{\pi_i^\downarrow} \quad (\text{S.13})$$

*Proof:* We rearrange the terms inside the summation of (21) based on  $\pi^\downarrow$ ,

$$\begin{aligned} \hat{\mathbf{h}} &= \frac{1}{n(n-1)} \sum_{\substack{1 \leq i, j \leq n \\ i \neq j}} \text{sign}(y_i - y_j) \cdot (\mathbf{x}_i - \mathbf{x}_j) \\ &= \frac{2}{n(n-1)} \sum_{\substack{1 \leq i, j \leq n \\ i \neq j}} \text{sign}(y_i - y_j) \cdot \mathbf{x}_i \\ &= \frac{2}{n(n-1)} \sum_{i=1}^n \sum_{j \neq \pi_i^\downarrow} \text{sign}(y_{\pi_i^\downarrow} - y_j) \cdot \mathbf{x}_{\pi_i^\downarrow} \\ &= \frac{2}{n(n-1)} \sum_{i=1}^n (n+1-2i) \cdot \mathbf{x}_{\pi_i^\downarrow}, \end{aligned}$$

where the last inequality uses the fact that there are  $(i-1)$   $y_j$  larger than and  $(n-i)$  smaller than  $y_{\pi_i^\downarrow}$ , thus  $\sum_{j \neq \pi_i^\downarrow} \text{sign}(y_{\pi_i^\downarrow} - y_j) = (n-i) - (i-1) = n+1-2i$ .  $\blacksquare$

## 7. Proof of Proposition 2

**Statement of Proposition 2:** For  $s$ -fused-sparse  $\theta^*$ , the Gaussian width of set  $\mathcal{A}_{\mathcal{K}}(\theta^*)$  with  $\mathcal{K} = \{\theta \mid |\mathcal{F}(\theta)| \leq s, \|\theta\|_2 = 1\}$  satisfies

$$w(\mathcal{A}_{\mathcal{K}}(\theta^*)) \leq O\left(\sqrt{s \log p}\right) \quad (\text{S.14})$$

*Proof:* Define the following sets

$$\begin{aligned} \mathcal{T}_{i,j} &= \left\{ \alpha \mathbf{u} \in \mathbb{R}^p \mid u_1 = \dots = u_{i-1} = u_{j+1} = \dots = u_p = 0, \right. \\ &\quad \left. u_i = \dots = u_j = \frac{1}{\sqrt{j-i+1}}, |\alpha| \leq \sqrt{2s+1} \right\} \end{aligned} \quad (\text{S.15})$$

$$\mathcal{T} = \bigcup_{i \leq j} \mathcal{T}_{i,j} \quad (\text{S.16})$$

For each  $\mathcal{T}_{i,j}$ , its Gaussian width can be calculated as

$$\begin{aligned} w(\mathcal{T}_{i,j}) &= \mathbb{E} \left[ \sup_{\mathbf{v} \in \mathcal{T}_{i,j}} \langle \mathbf{v}, \mathbf{g} \rangle \right] = \sqrt{2s+1} \cdot \mathbb{E} [|\langle \mathbf{u}, \mathbf{g} \rangle|] \\ &= \sqrt{2s+1} \cdot \mathbb{E} |g| = O(\sqrt{2s+1}), \end{aligned}$$

where  $\mathbf{u}$  is defined in (S.15) and  $g$  is a standard Gaussian random variable. We apply Lemma A to  $\mathcal{T}$ , and obtain

$$\begin{aligned} w(\mathcal{T}) &\leq \max_{i \leq j} w(\mathcal{T}_{i,j}) + 2 \sup_{\mathbf{z} \in \mathcal{T}} \|\mathbf{z}\|_2 \sqrt{\log \left( \binom{p}{2} + p \right)} \\ &\leq O(\sqrt{2s+1}) + O(\sqrt{2s+1} \cdot \sqrt{\log p}) \\ &= O(\sqrt{s \log p}) \end{aligned}$$

Next we show that  $\mathcal{A}_{\mathcal{K}}(\boldsymbol{\theta}^*) \subseteq \text{conv}(\mathcal{T})$ . Since  $\mathcal{K} = \{\boldsymbol{\theta} \mid |\mathcal{F}(\boldsymbol{\theta})| \leq s, \|\boldsymbol{\theta}\|_2 = 1\}$  and  $\mathcal{A}_{\mathcal{K}}(\boldsymbol{\theta}^*) = \text{cone}\left\{\mathbf{v} \mid \mathbf{v} = \hat{\boldsymbol{\theta}} - \boldsymbol{\theta}^*, \hat{\boldsymbol{\theta}} \in \mathcal{K}\right\} \cap \mathbb{S}^{p-1}$  by definition, we have  $|\mathcal{F}(\mathbf{v})| \leq 2s$  for any  $\mathbf{v} \in \mathcal{A}_{\mathcal{K}}(\boldsymbol{\theta}^*)$ . Suppose  $|\mathcal{F}(\mathbf{v})| = t \leq 2s$  and  $\mathcal{F}(\mathbf{v}) = \{i_1, i_2, \dots, i_t\}$ . For simplicity, we also let  $i_0 = 0$  and  $i_{t+1} = p$ . Then any  $\mathbf{v} \in \mathcal{A}_{\mathcal{K}}(\boldsymbol{\theta}^*)$  can be written as a convex combination of  $t + 2$  points in  $\mathcal{T}$ . To see this, we rewrite  $\mathbf{v}$  as

$$\begin{aligned} \mathbf{v} &= \sum_{r=0}^t \mathbf{v}_{i_r+1:i_{r+1}} = \sum_{r=0}^t \frac{\|\mathbf{v}_{i_r+1:i_{r+1}}\|_2}{\sqrt{t+1}} \cdot \frac{\sqrt{t+1} \mathbf{v}_{i_r+1:i_{r+1}}}{\|\mathbf{v}_{i_r+1:i_{r+1}}\|_2} \\ &\quad + \left(1 - \sum_{r=0}^t \frac{\|\mathbf{v}_{i_r+1:i_{r+1}}\|_2}{\sqrt{t+1}}\right) \cdot \mathbf{0}, \end{aligned} \quad (\text{S.17})$$

where  $\mathbf{v}_{i_r+1:i_{r+1}}$  is obtained from  $\mathbf{v}$  by keeping the entries from index  $i_r + 1$  to  $i_{r+1}$  while zeroing out the rest. Let

$\mathbf{u}_{i_r+1:i_{r+1}} = \frac{\sqrt{t+1} \mathbf{v}_{i_r+1:i_{r+1}}}{\|\mathbf{v}_{i_r+1:i_{r+1}}\|_2}$ , and we have

$$\begin{aligned} \|\mathbf{u}_{i_r+1:i_{r+1}}\|_2 &= \sqrt{t+1} \leq \sqrt{2s+1} \\ \implies \mathbf{u}_{i_r+1:i_{r+1}} &\in \mathcal{T}_{i_r+1:i_{r+1}} \subseteq \mathcal{T}. \end{aligned}$$

It follows from  $\|\mathbf{v}\|_2 = 1$  that

$$\begin{aligned} \sum_{r=0}^t \frac{\|\mathbf{v}_{i_r+1:i_{r+1}}\|_2}{\sqrt{t+1}} &\leq \frac{\sqrt{(t+1) \sum_{r=0}^t \|\mathbf{v}_{i_r+1:i_{r+1}}\|_2^2}}{\sqrt{t+1}} = 1 \\ \implies 1 - \sum_{r=0}^t \frac{\|\mathbf{v}_{i_r+1:i_{r+1}}\|_2}{\sqrt{t+1}} &\geq 0 \end{aligned}$$

Hence (S.17) is indeed a convex combination of  $t+2$  points in  $\mathcal{T}$ , which implies  $\mathcal{A}_{\mathcal{K}}(\boldsymbol{\theta}^*) \subseteq \text{conv}(\mathcal{T})$ . Finally, by the properties of Gaussian width, we conclude that

$$w(\mathcal{A}_{\mathcal{K}}(\boldsymbol{\theta}^*)) \leq w(\text{conv}(\mathcal{T})) = w(\mathcal{T}) \leq O(\sqrt{s \log p})$$

■

## 8. Proof of Lemma 2

**Statement of Lemma 2:** Define the  $U$ -statistic

$$U_{n,m}(h) = \frac{(n-m)!}{n!} \sum_{\substack{1 \leq i_1, \dots, i_m \leq n \\ i_1 \neq i_2 \neq \dots \neq i_m}} h(\mathbf{z}_{i_1}, \dots, \mathbf{z}_{i_m}) \quad (\text{S.18})$$

with order  $m$  and kernel  $h : \mathbb{R}^{d \times m} \mapsto \mathbb{R}$  based on  $n$  independent copies of random vector  $\mathbf{z} \in \mathbb{R}^d$ , denoted by  $\mathbf{z}_1, \dots, \mathbf{z}_n$ . If  $h(\cdot, \dots, \cdot)$  is sub-Gaussian with  $\|h\|_{\psi_2} \leq \kappa$ , then the following inequality holds for  $U_{n,m}(h)$  with any  $\delta > 0$ ,

$$\mathbb{P}(|U_{n,m}(h) - \mathbb{E}U_{n,m}(h)| > \delta) \leq 2 \exp\left(-C \left[\frac{n}{m}\right] \cdot \frac{\delta^2}{\kappa^2}\right), \quad (\text{S.19})$$

in which  $C$  is an absolute constant.

*Proof:* Our proof is based on Hoeffding's decomposition for  $U$ -statistics. For simplicity, we use  $U$  as shorthand for  $U_{n,m}(h)$ . Given a permutation  $\pi$  of  $\{1, \dots, n\}$ , define

$$W_\pi = \frac{1}{\lfloor \frac{n}{m} \rfloor} \sum_{k=0}^{\lfloor \frac{n}{m} \rfloor - 1} h(\mathbf{z}_{\pi_{mk+1}}, \dots, \mathbf{z}_{\pi_{m(k+1)}}),$$

The  $U$ -statistic can be rewritten as  $U = \frac{1}{n!} \sum_{\pi} W_\pi$ , and the summation is over all possible permutations of  $\{1, \dots, n\}$ . As no copy of  $\mathbf{z}$  appears more than twice in a single  $W_\pi$ ,  $W_\pi$  is an average of  $\lfloor \frac{n}{m} \rfloor$  independent sub-Gaussian random variables. Hence the  $\psi_2$ -norm of its centered version satisfies  $\|W_\pi - \mathbb{E}W_\pi\|_{\psi_2} \leq c\kappa / \sqrt{\lfloor \frac{n}{m} \rfloor}$ . Using Chernoff technique, we have for any  $t > 0$ ,

$$\begin{aligned} \mathbb{P}(U - \mathbb{E}U > \delta) &\leq e^{-t\delta} \cdot \mathbb{E}[\exp(t(U - \mathbb{E}U))] \\ &= e^{-t\delta} \cdot \mathbb{E}\left[\exp\left(\frac{t}{n!} \sum_{\pi} (W_\pi - \mathbb{E}U)\right)\right] \\ &\leq e^{-t\delta} \cdot \mathbb{E}\left[\frac{1}{n!} \sum_{\pi} \exp(t(W_\pi - \mathbb{E}U))\right] \\ &= e^{-t\delta} \cdot \mathbb{E}[\exp(t(W_\pi - \mathbb{E}W_\pi))] \\ &\leq \exp\left(-t\delta + ct^2 \cdot \frac{\kappa^2}{\lfloor \frac{n}{m} \rfloor}\right), \end{aligned} \quad (\text{S.20})$$

where the second inequality is obtained via Jensen's inequality and the last one follows the moment generating function bound for centered sub-Gaussian random variable. Choosing  $t = \lfloor \frac{n}{m} \rfloor \delta / 2c\kappa^2$  to minimize right-hand side of (S.20), we obtain

$$\mathbb{P}(U - \mathbb{E}U > \delta) \leq \exp\left(-C \left[\frac{n}{m}\right] \cdot \frac{\delta^2}{\kappa^2}\right),$$

where  $C = 1/2c$ . To complete the proof, we just need to repeat the argument above for  $\mathbb{P}(U - \mathbb{E}U < -\delta)$ . ■

## References

- Banerjee, A., Chen, S., Fazayeli, F., and Sivakumar, V. Estimation with norm regularization. In *Advances in Neural Information Processing Systems (NIPS)*, 2014.
- Chen, S. and Banerjee, A. Structured estimation with atomic norms: General bounds and applications. In *Proceedings of the 28th International Conference on Neural Information Processing Systems*, 2015.
- Maurer, A., Pontil, M., and Romera-Paredes, B. An Inequality with Applications to Structured Sparsity and Multitask Dictionary Learning. In *Conference on Learning Theory (COLT)*, 2014.

Negahban, S., Ravikumar, P., Wainwright, M. J., and Yu, B. A unified framework for the analysis of regularized  $M$ -estimators. *Statistical Science*, 27(4):538–557, 2012.

Vershynin, R. Introduction to the non-asymptotic analysis of random matrices. In Eldar, Y. and Kutyniok, G. (eds.), *Compressed Sensing*, chapter 5, pp. 210–268. Cambridge University Press, 2012.
